# Supplementary figures and images for: Lipidomics and Anti-Inflammation Activity of Brown Algae, Lobophora sp., in Vietnam
Source: Hindawi journal article supplement (doi:10.1155/2020/8829054), 2020-12-09

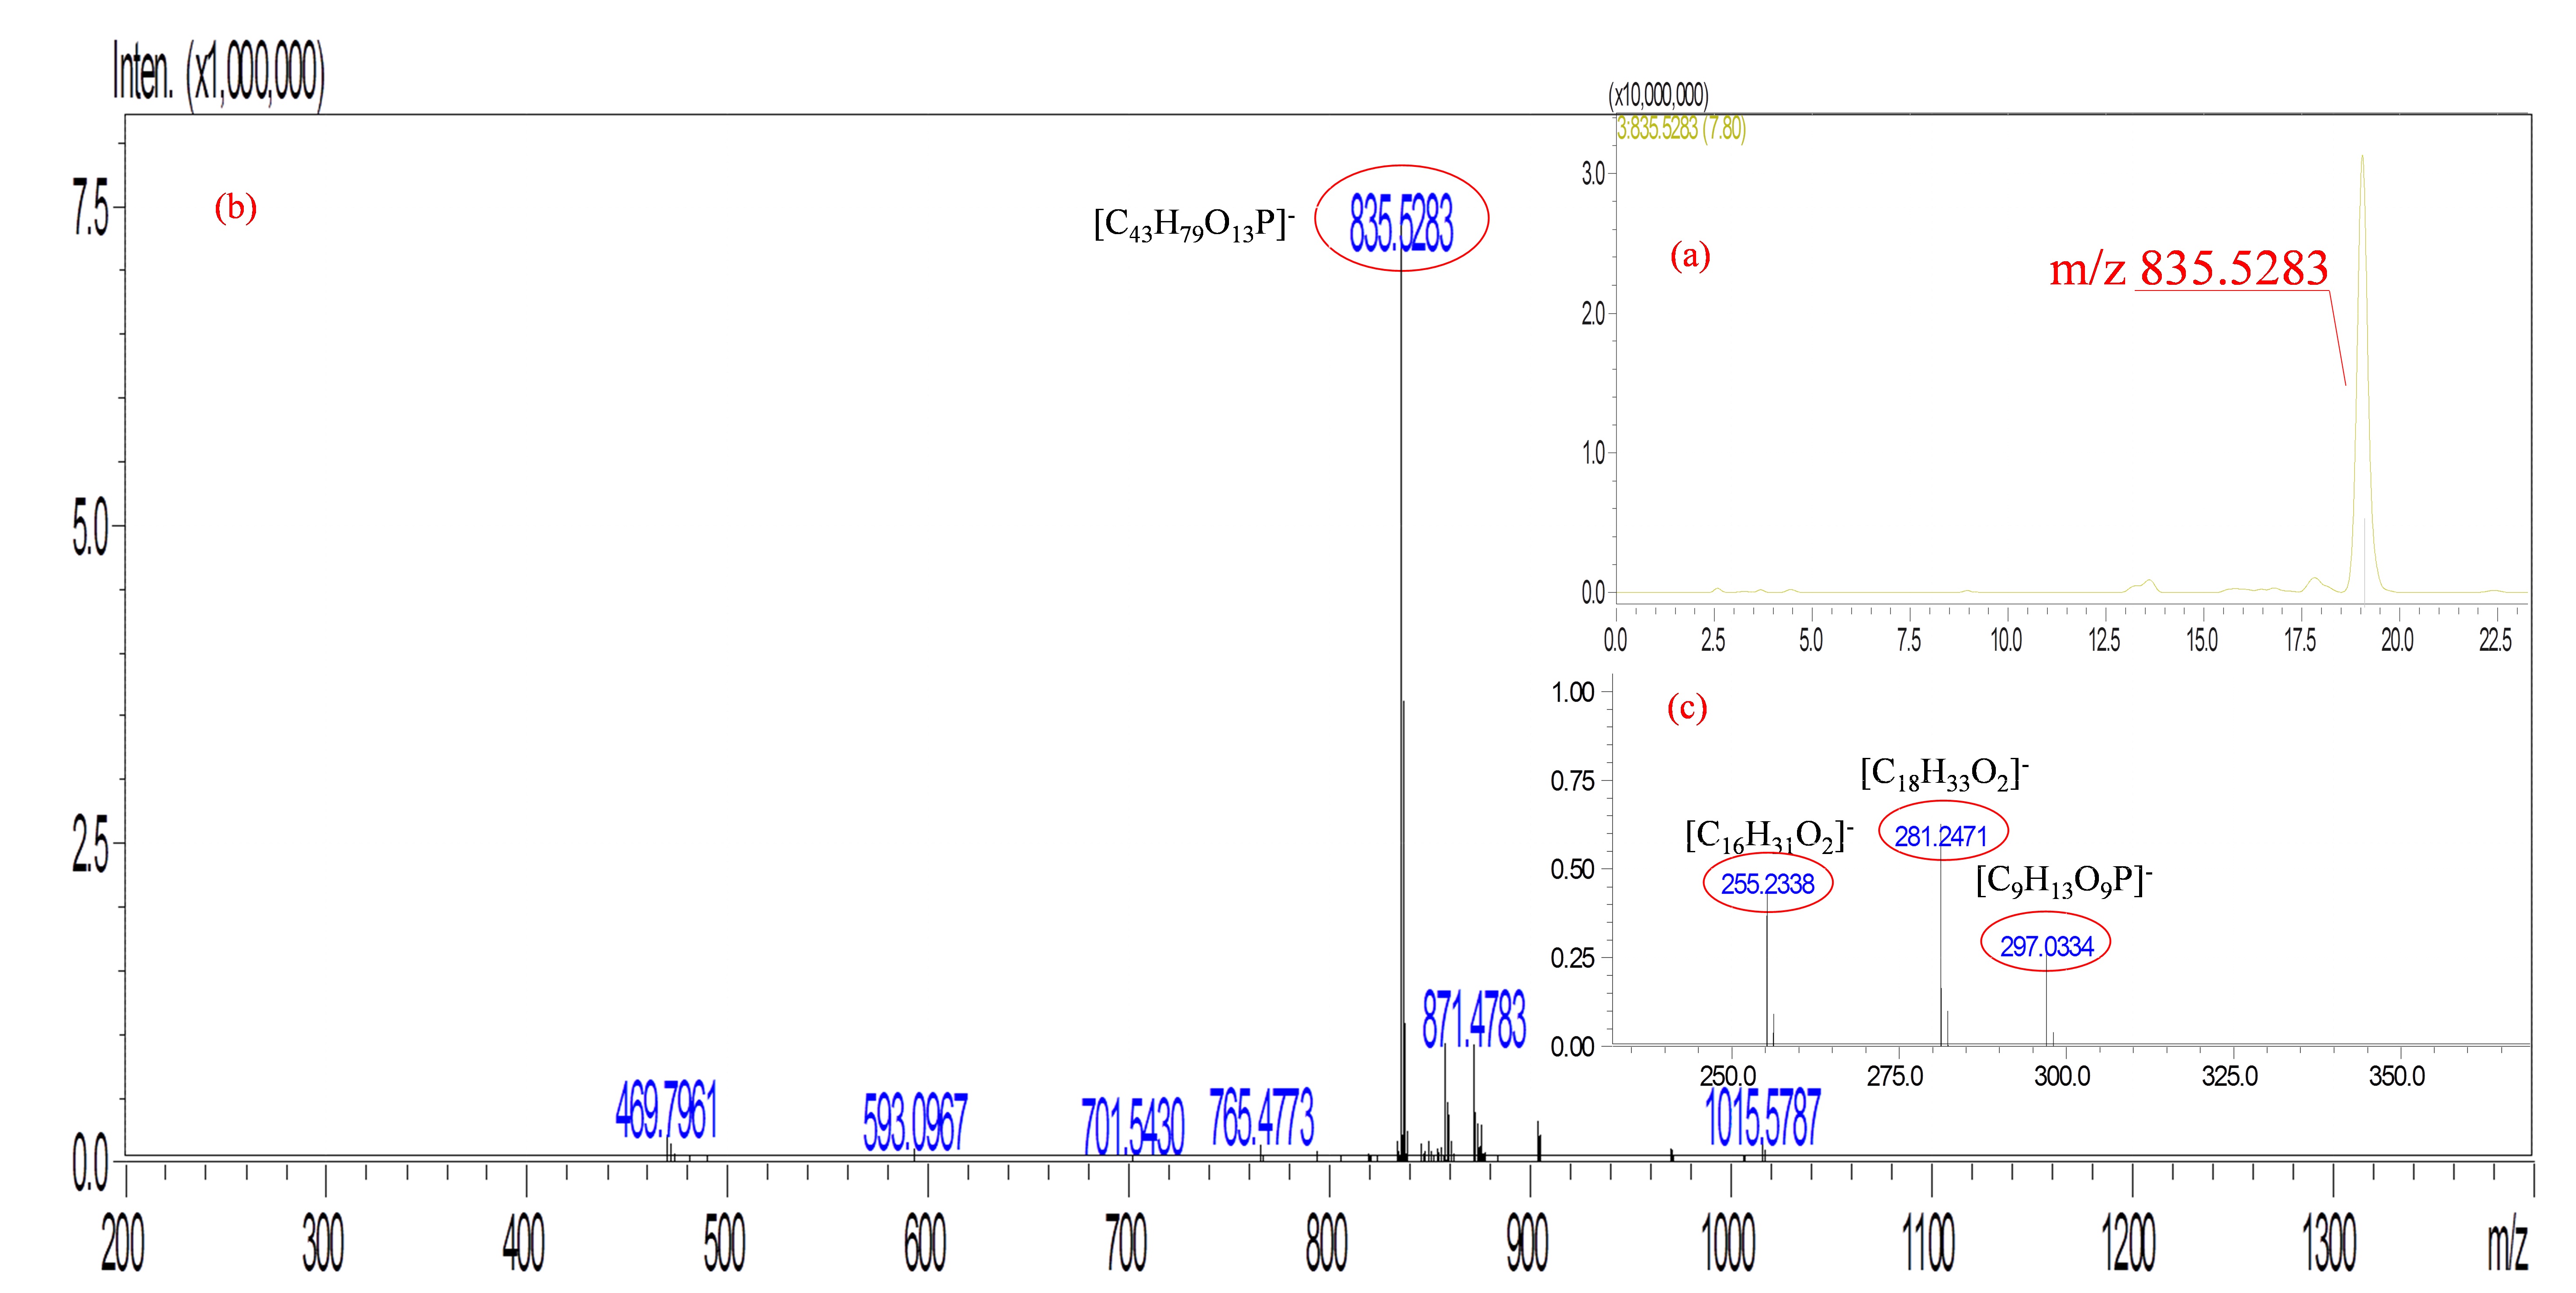

Supplement: f1 [file 8829054.f1.zip › 8829054.f1/Figure 1S.jpg]

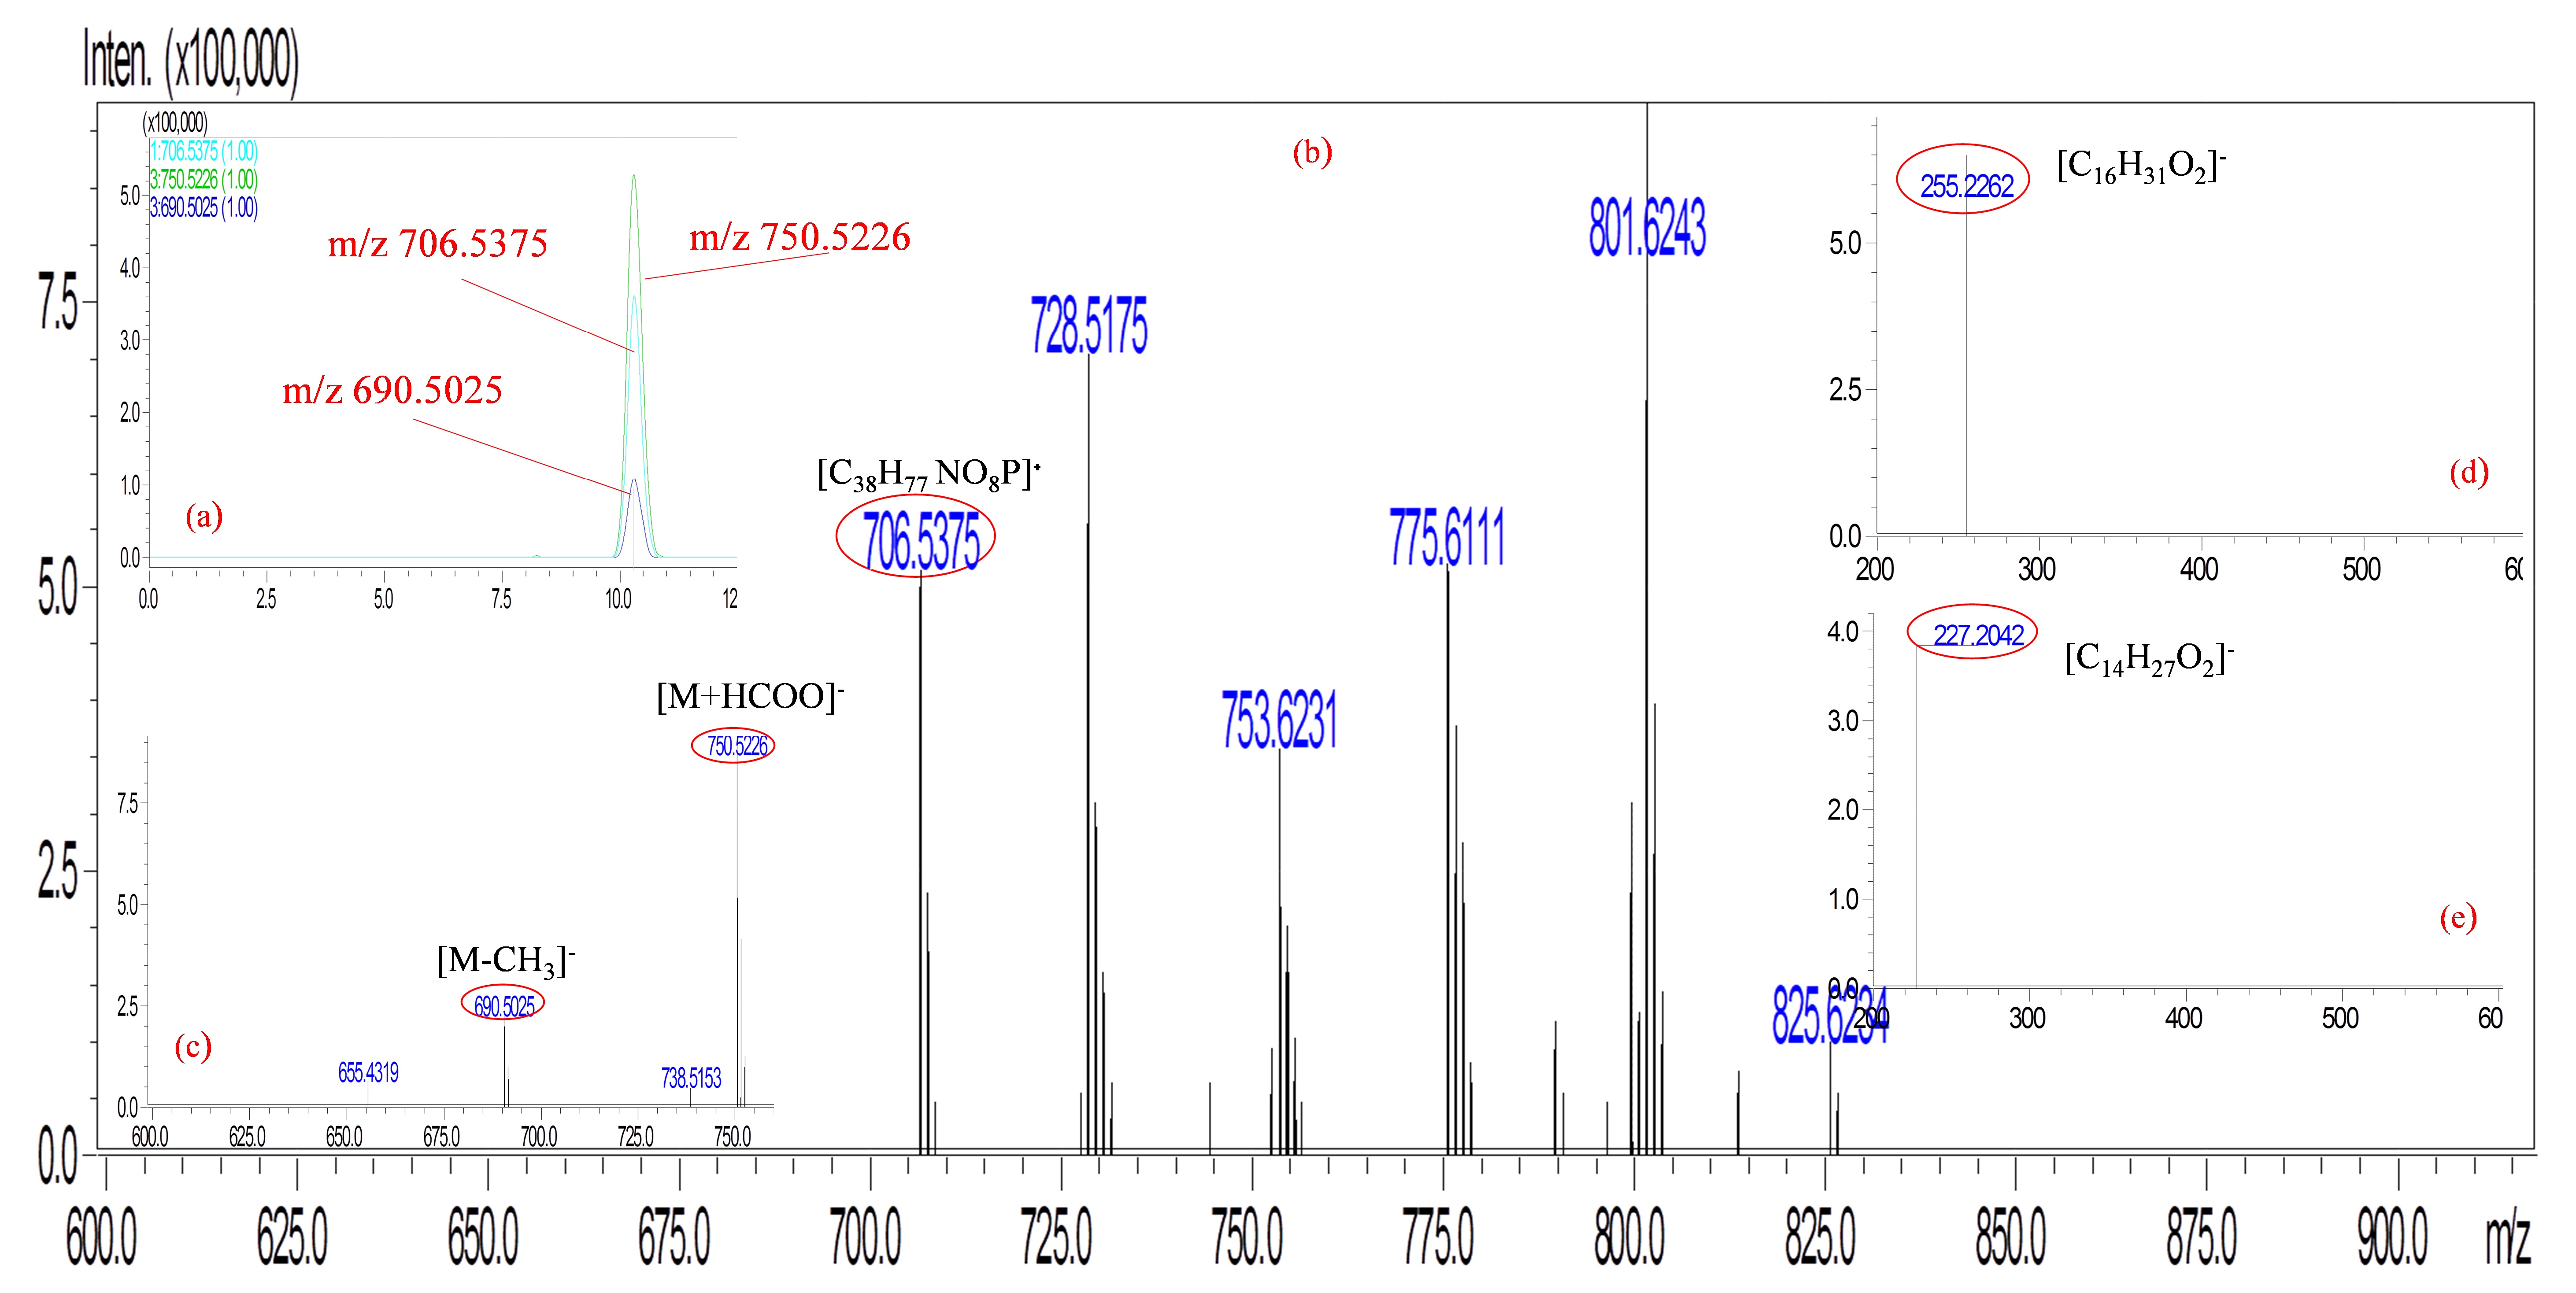

Supplement: f1 [file 8829054.f1.zip › 8829054.f1/Figure 2S.jpg]

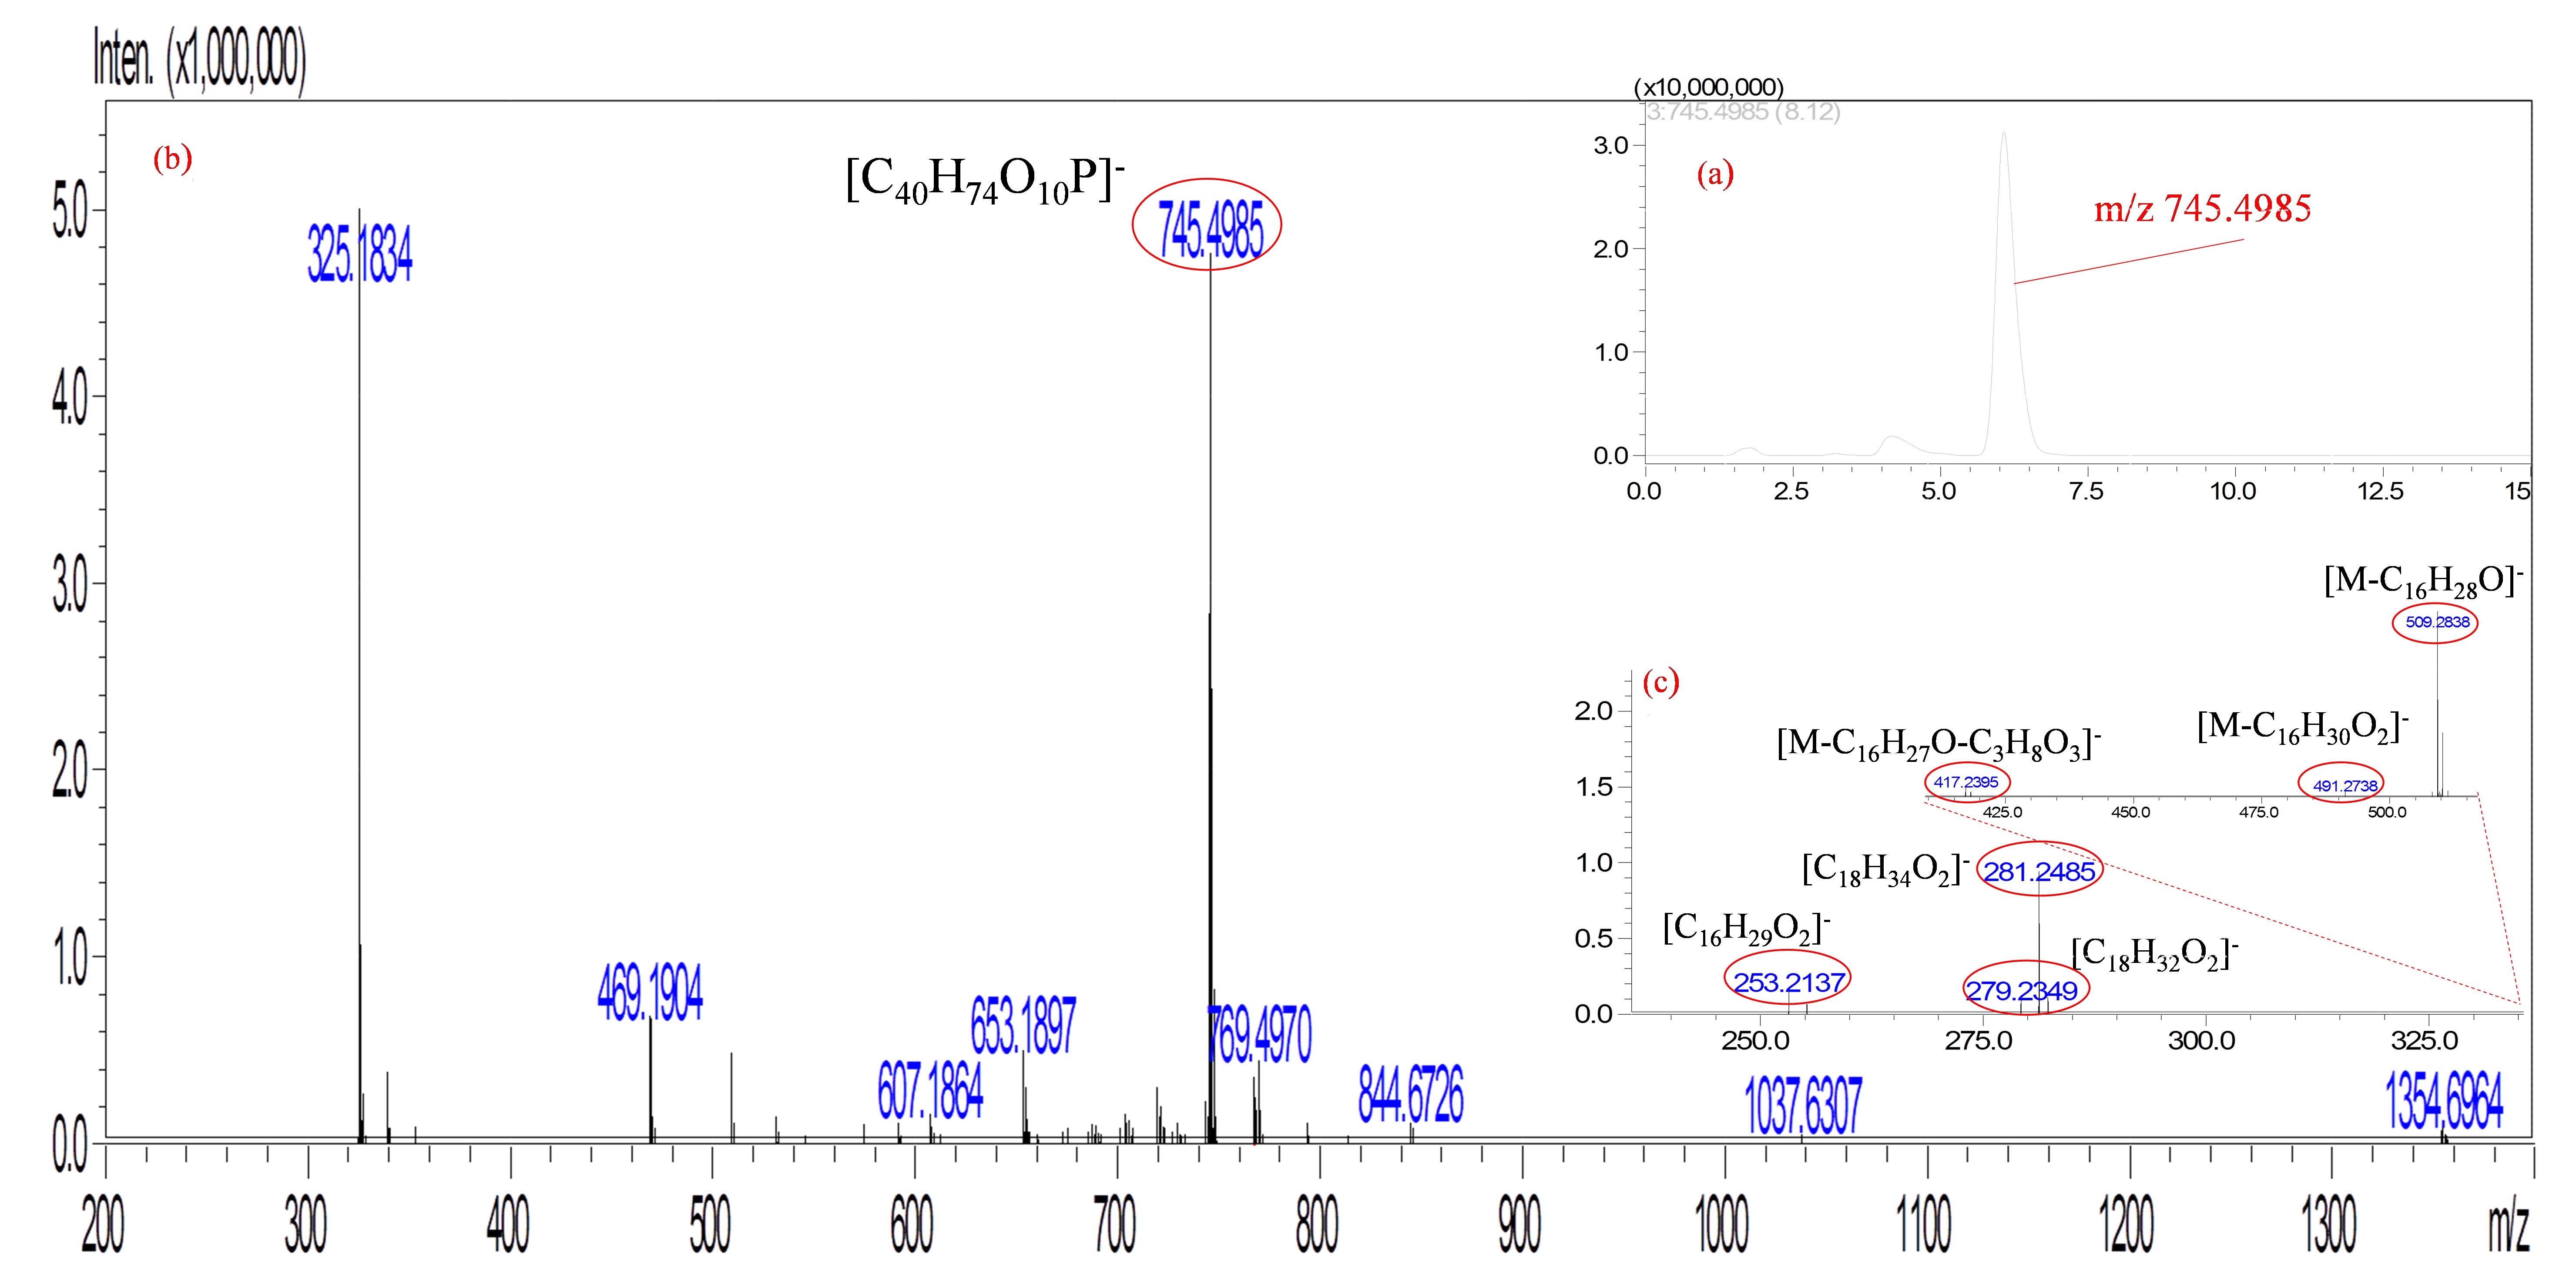

Supplement: f1 [file 8829054.f1.zip › 8829054.f1/Figure 3S.jpg]

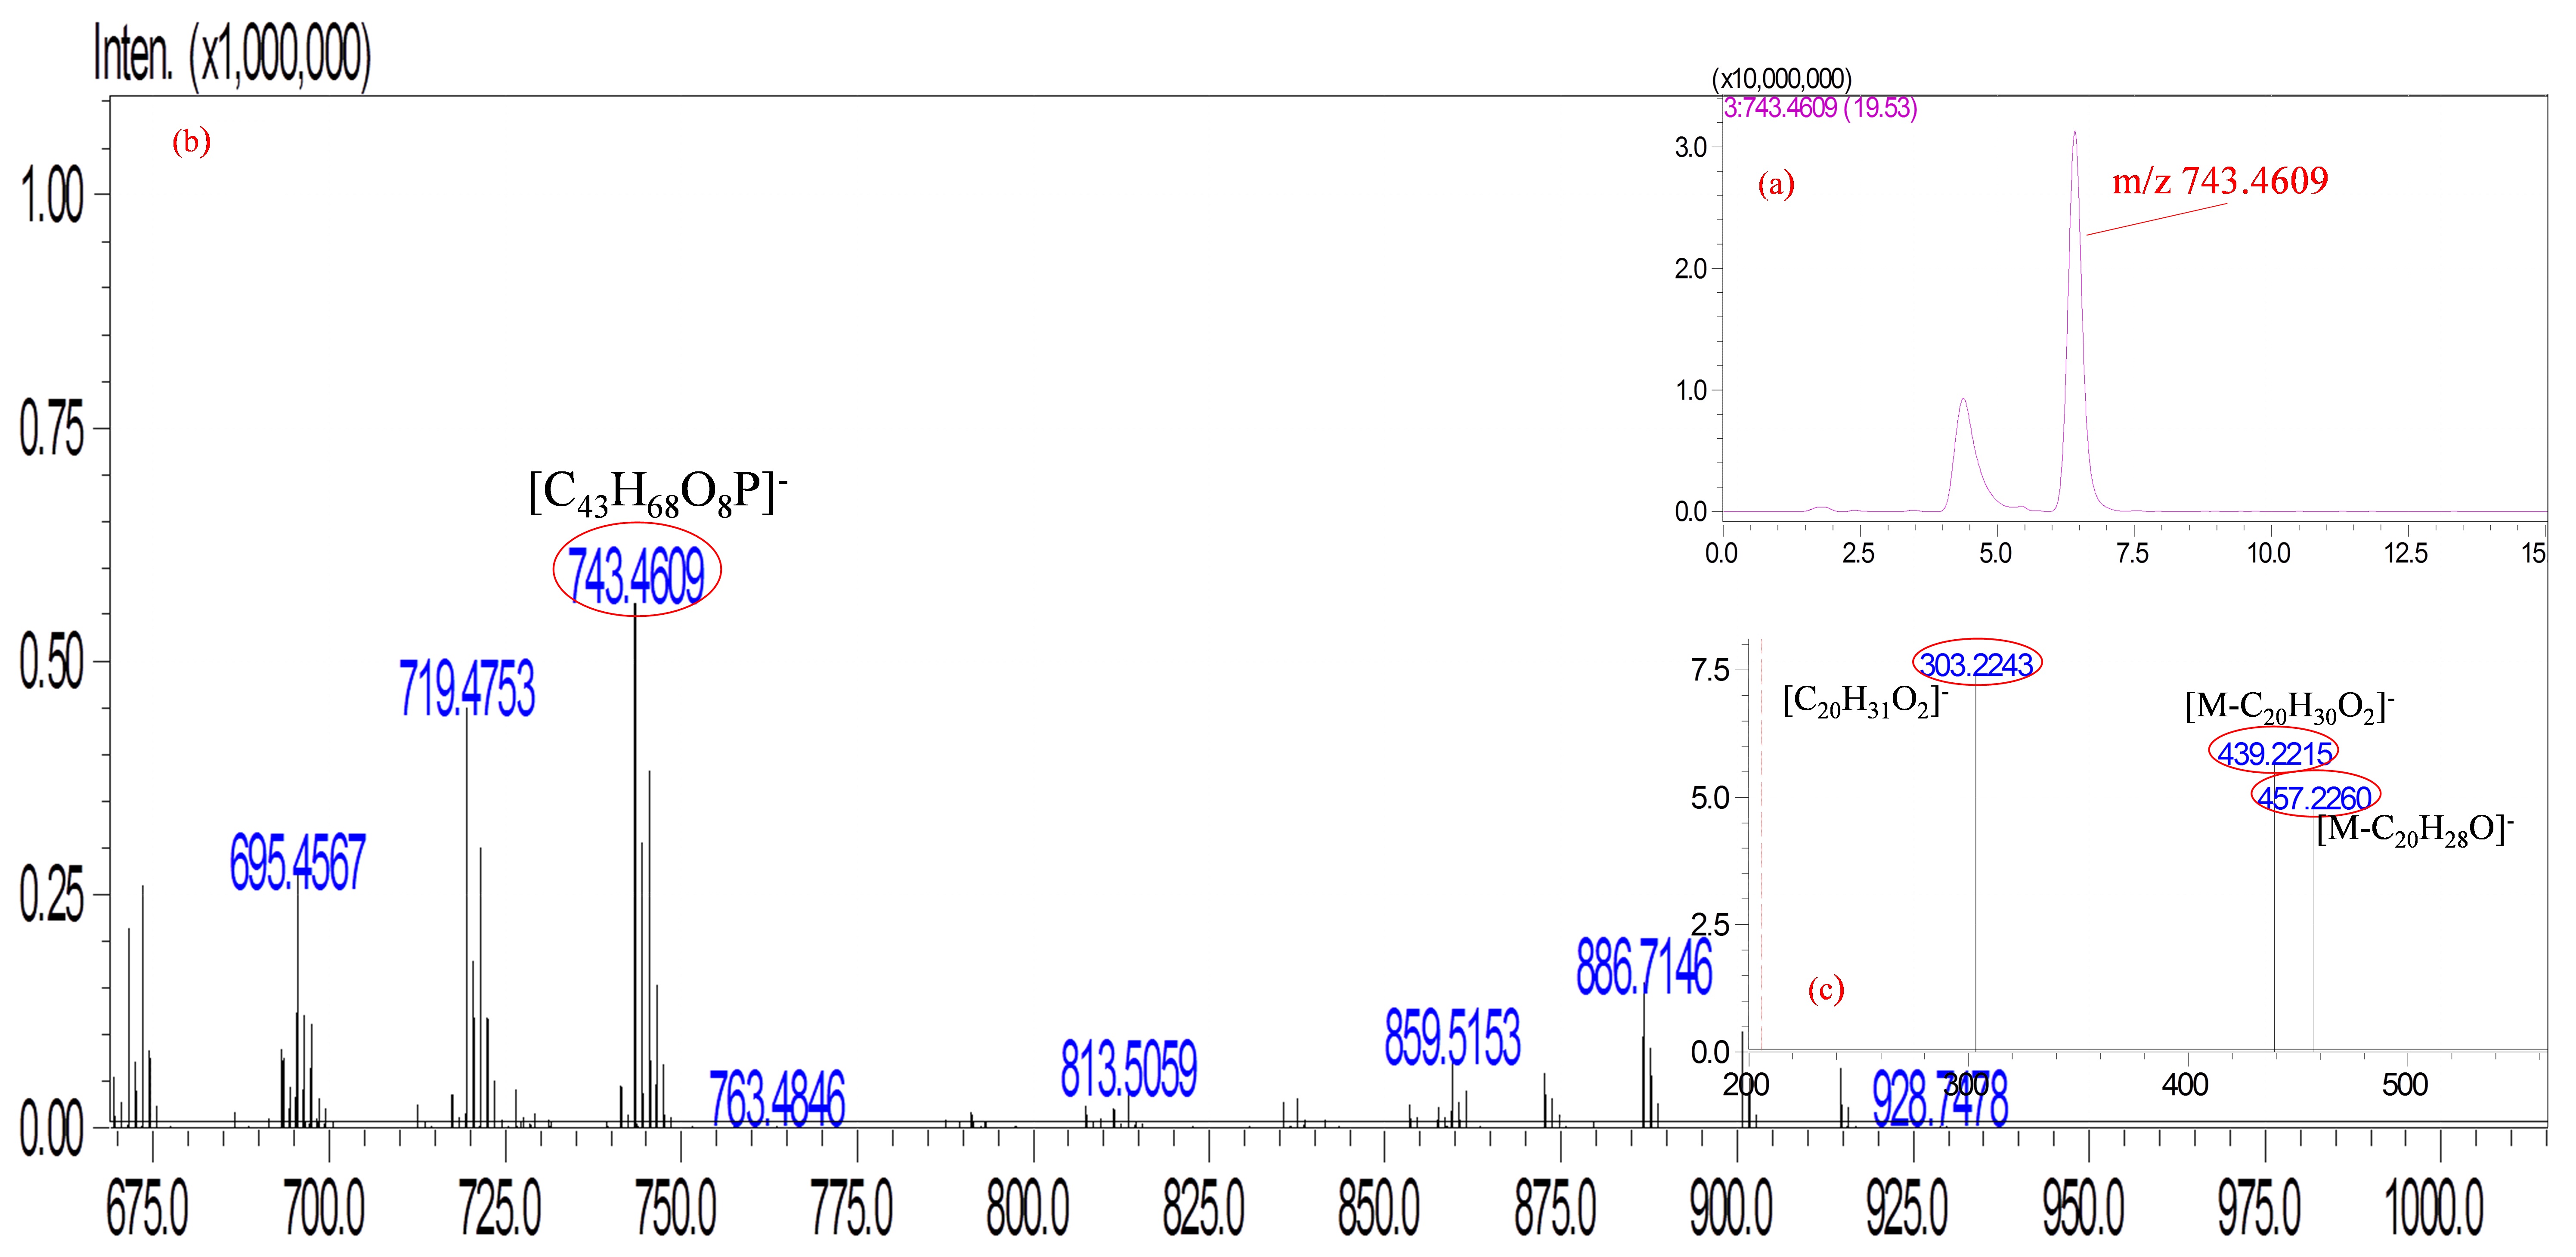

Supplement: f1 [file 8829054.f1.zip › 8829054.f1/Figure 4S.jpg]

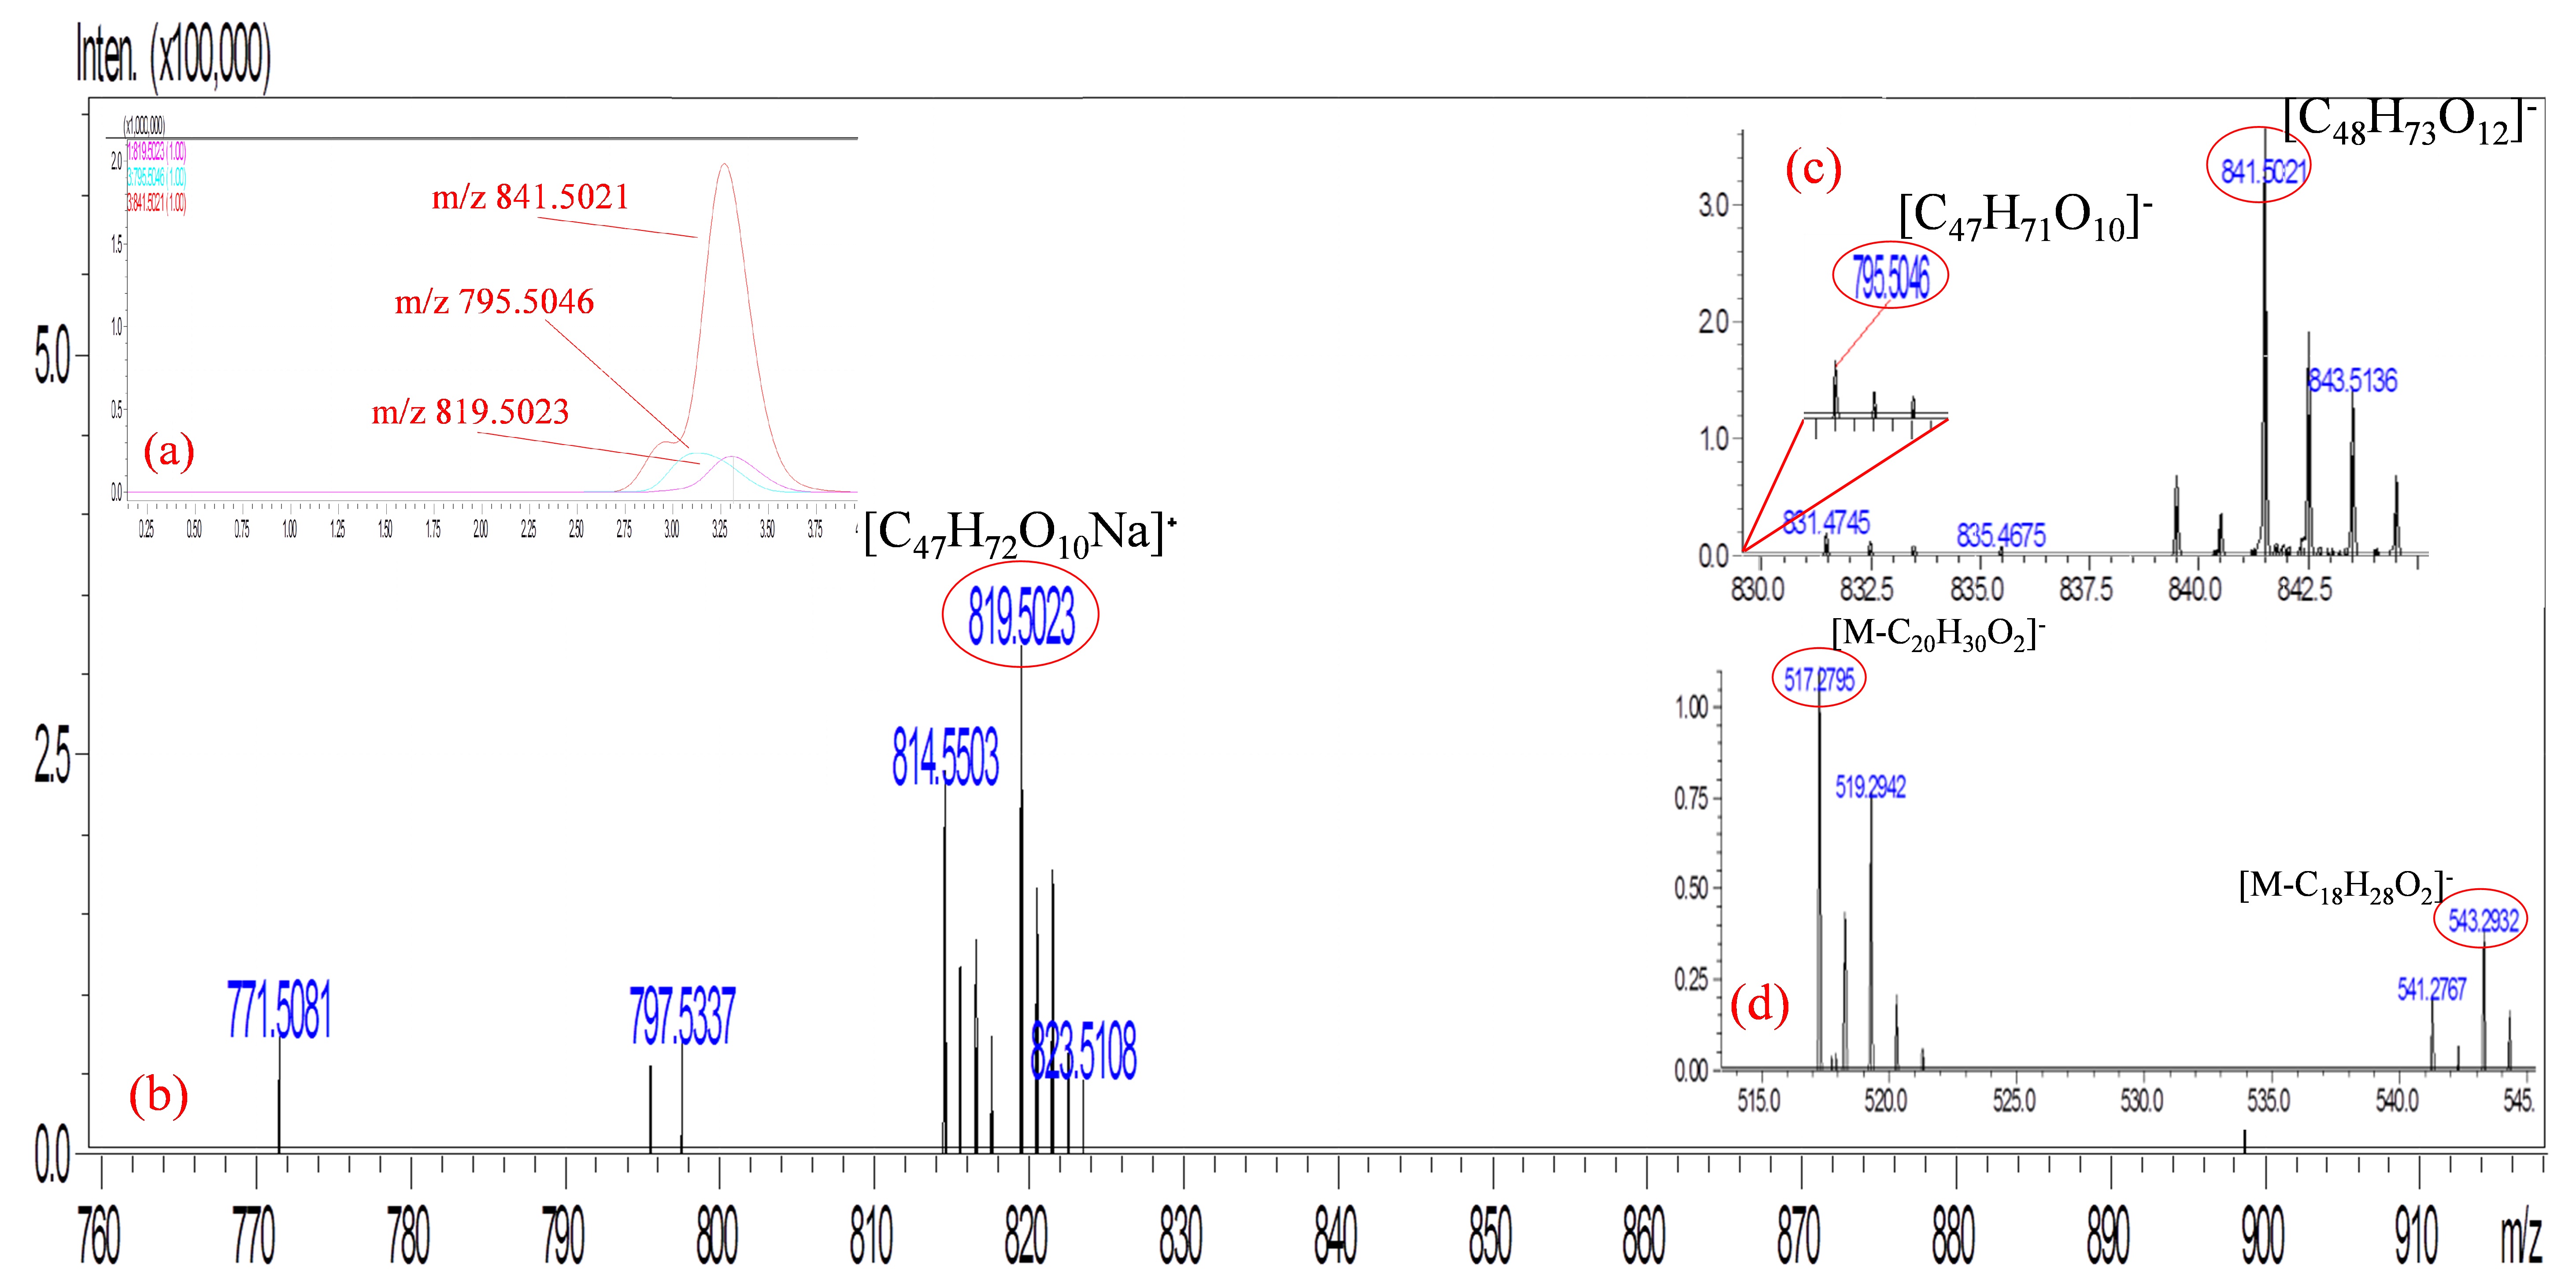

Supplement: f1 [file 8829054.f1.zip › 8829054.f1/Figure 5S.jpg]

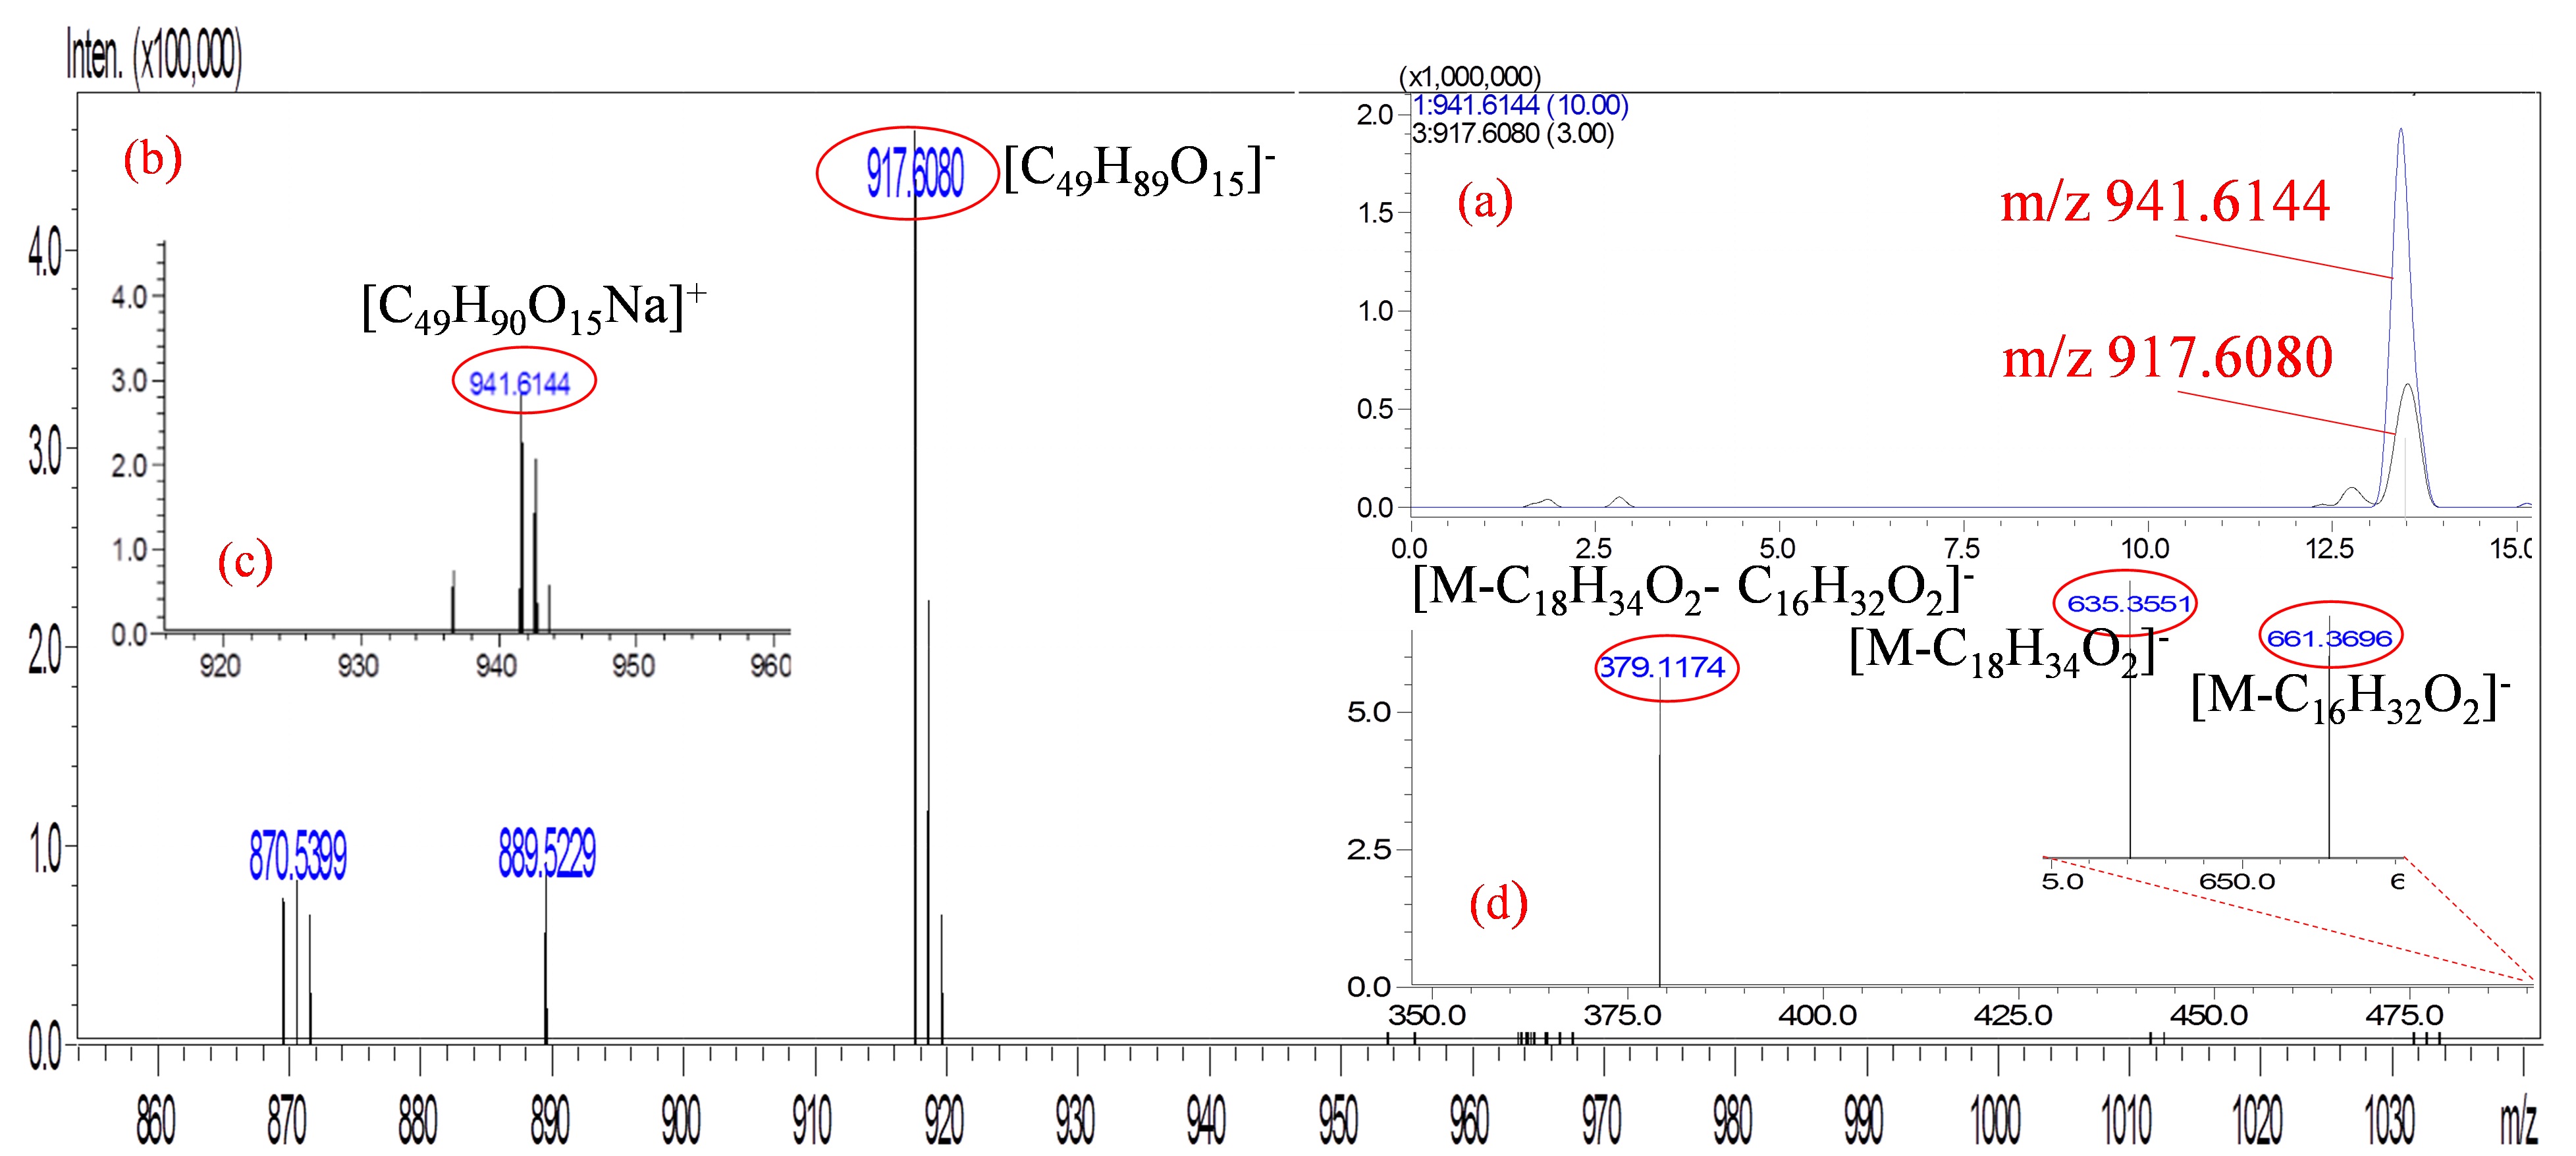

Supplement: f1 [file 8829054.f1.zip › 8829054.f1/Figure 6S.jpg]

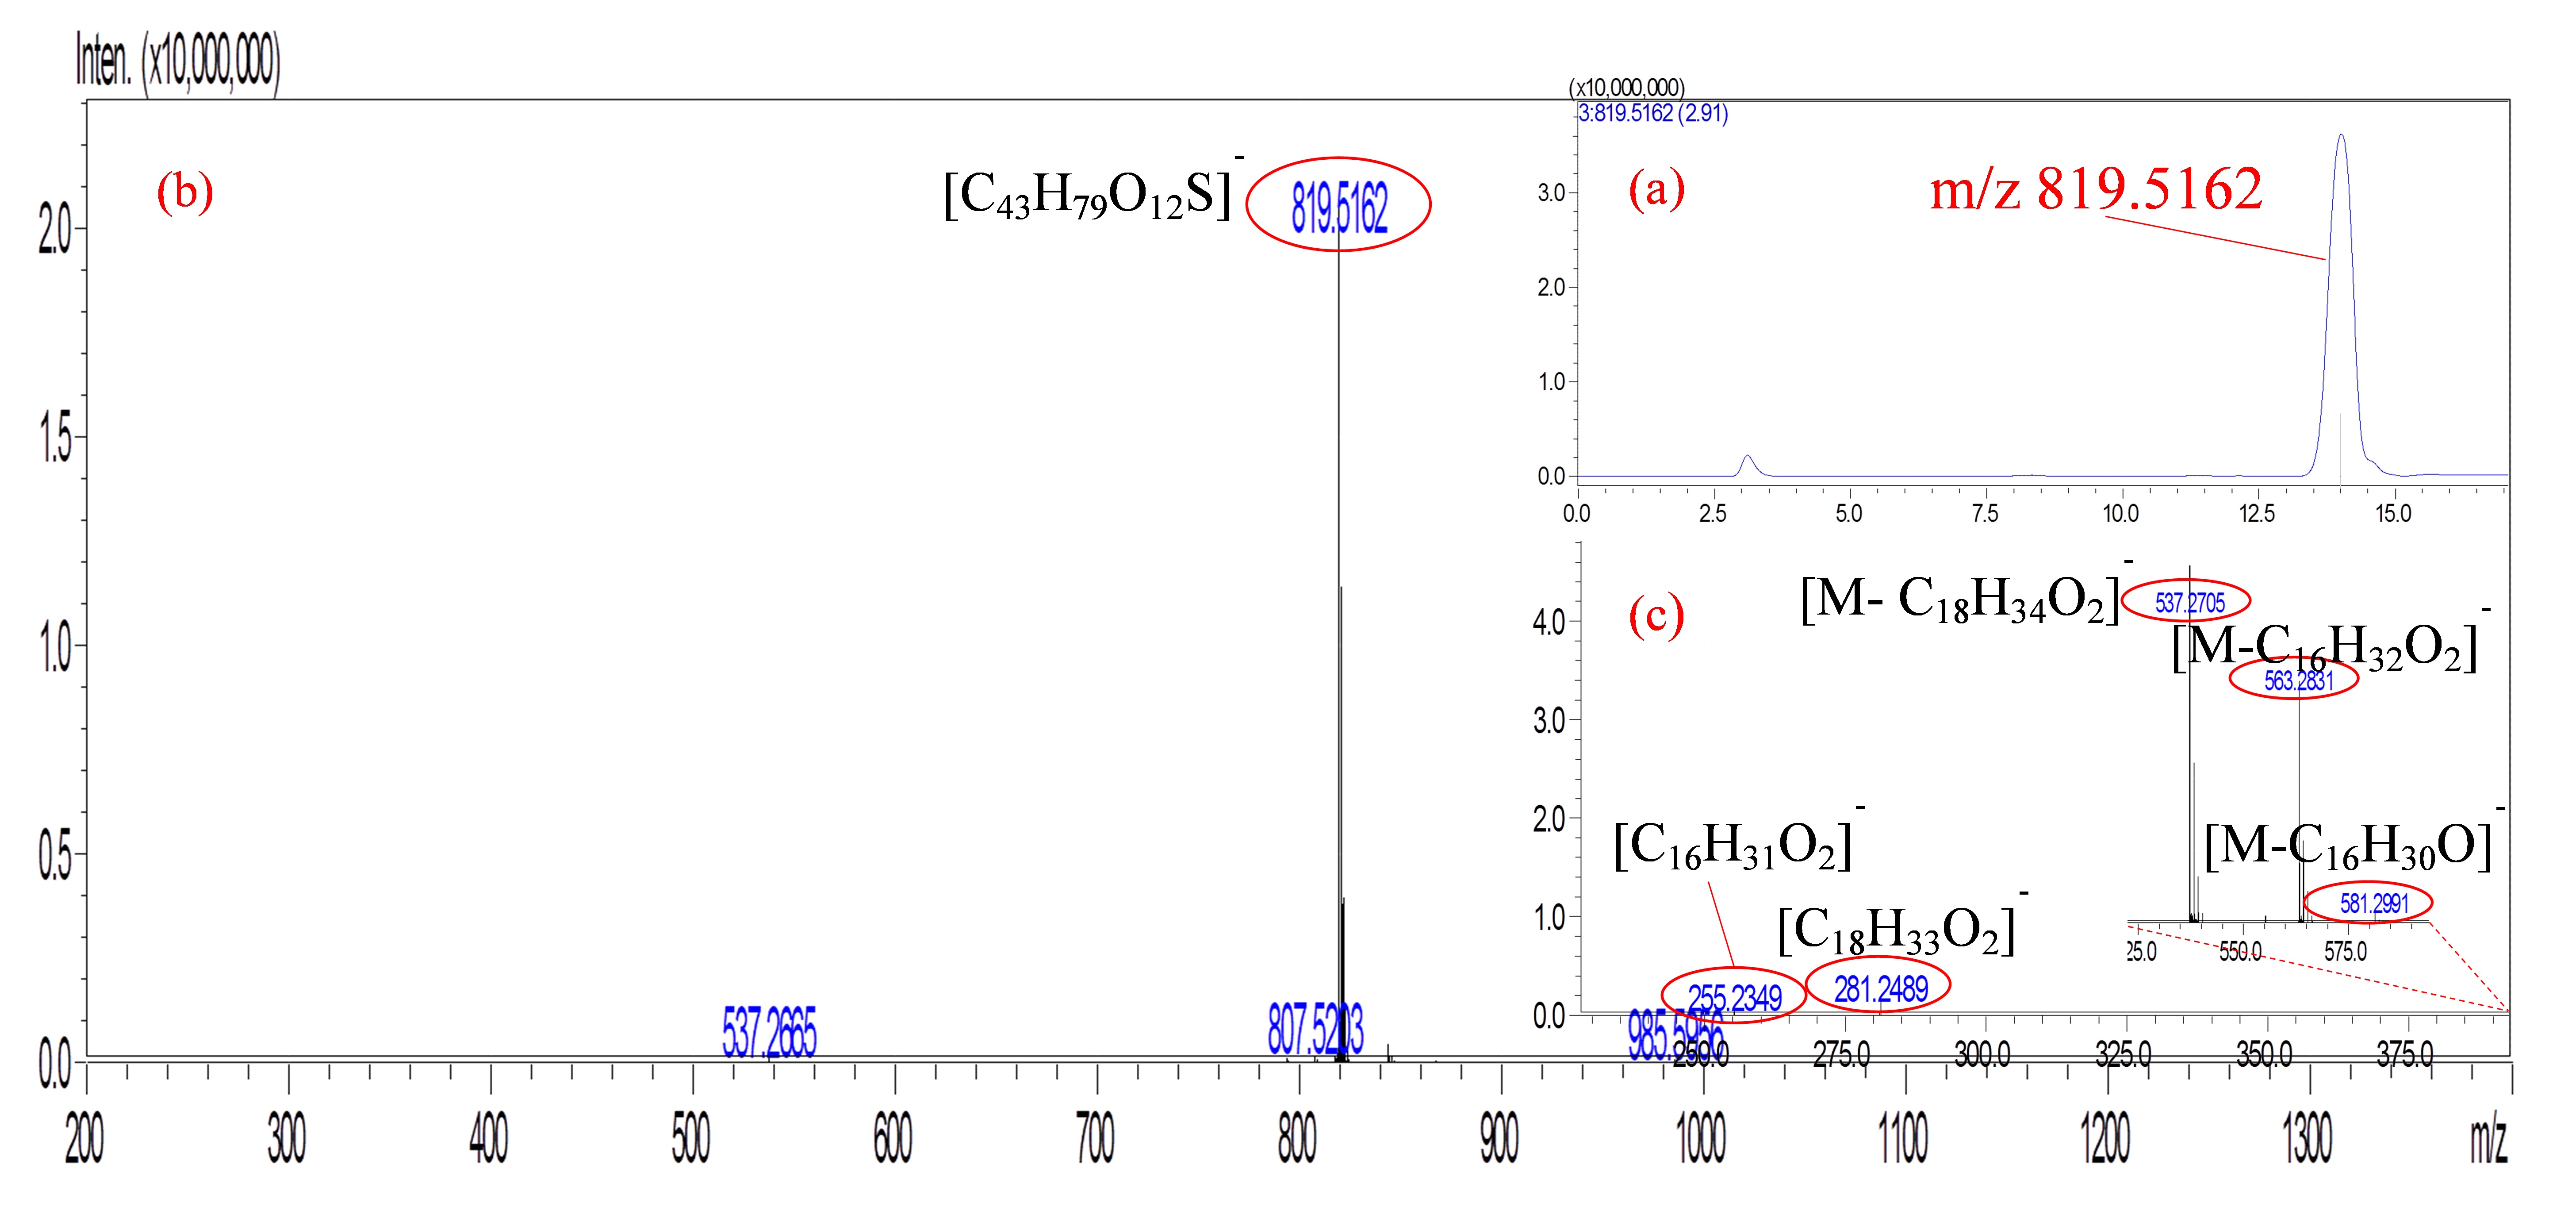

Supplement: f1 [file 8829054.f1.zip › 8829054.f1/Figure 7S.jpg]

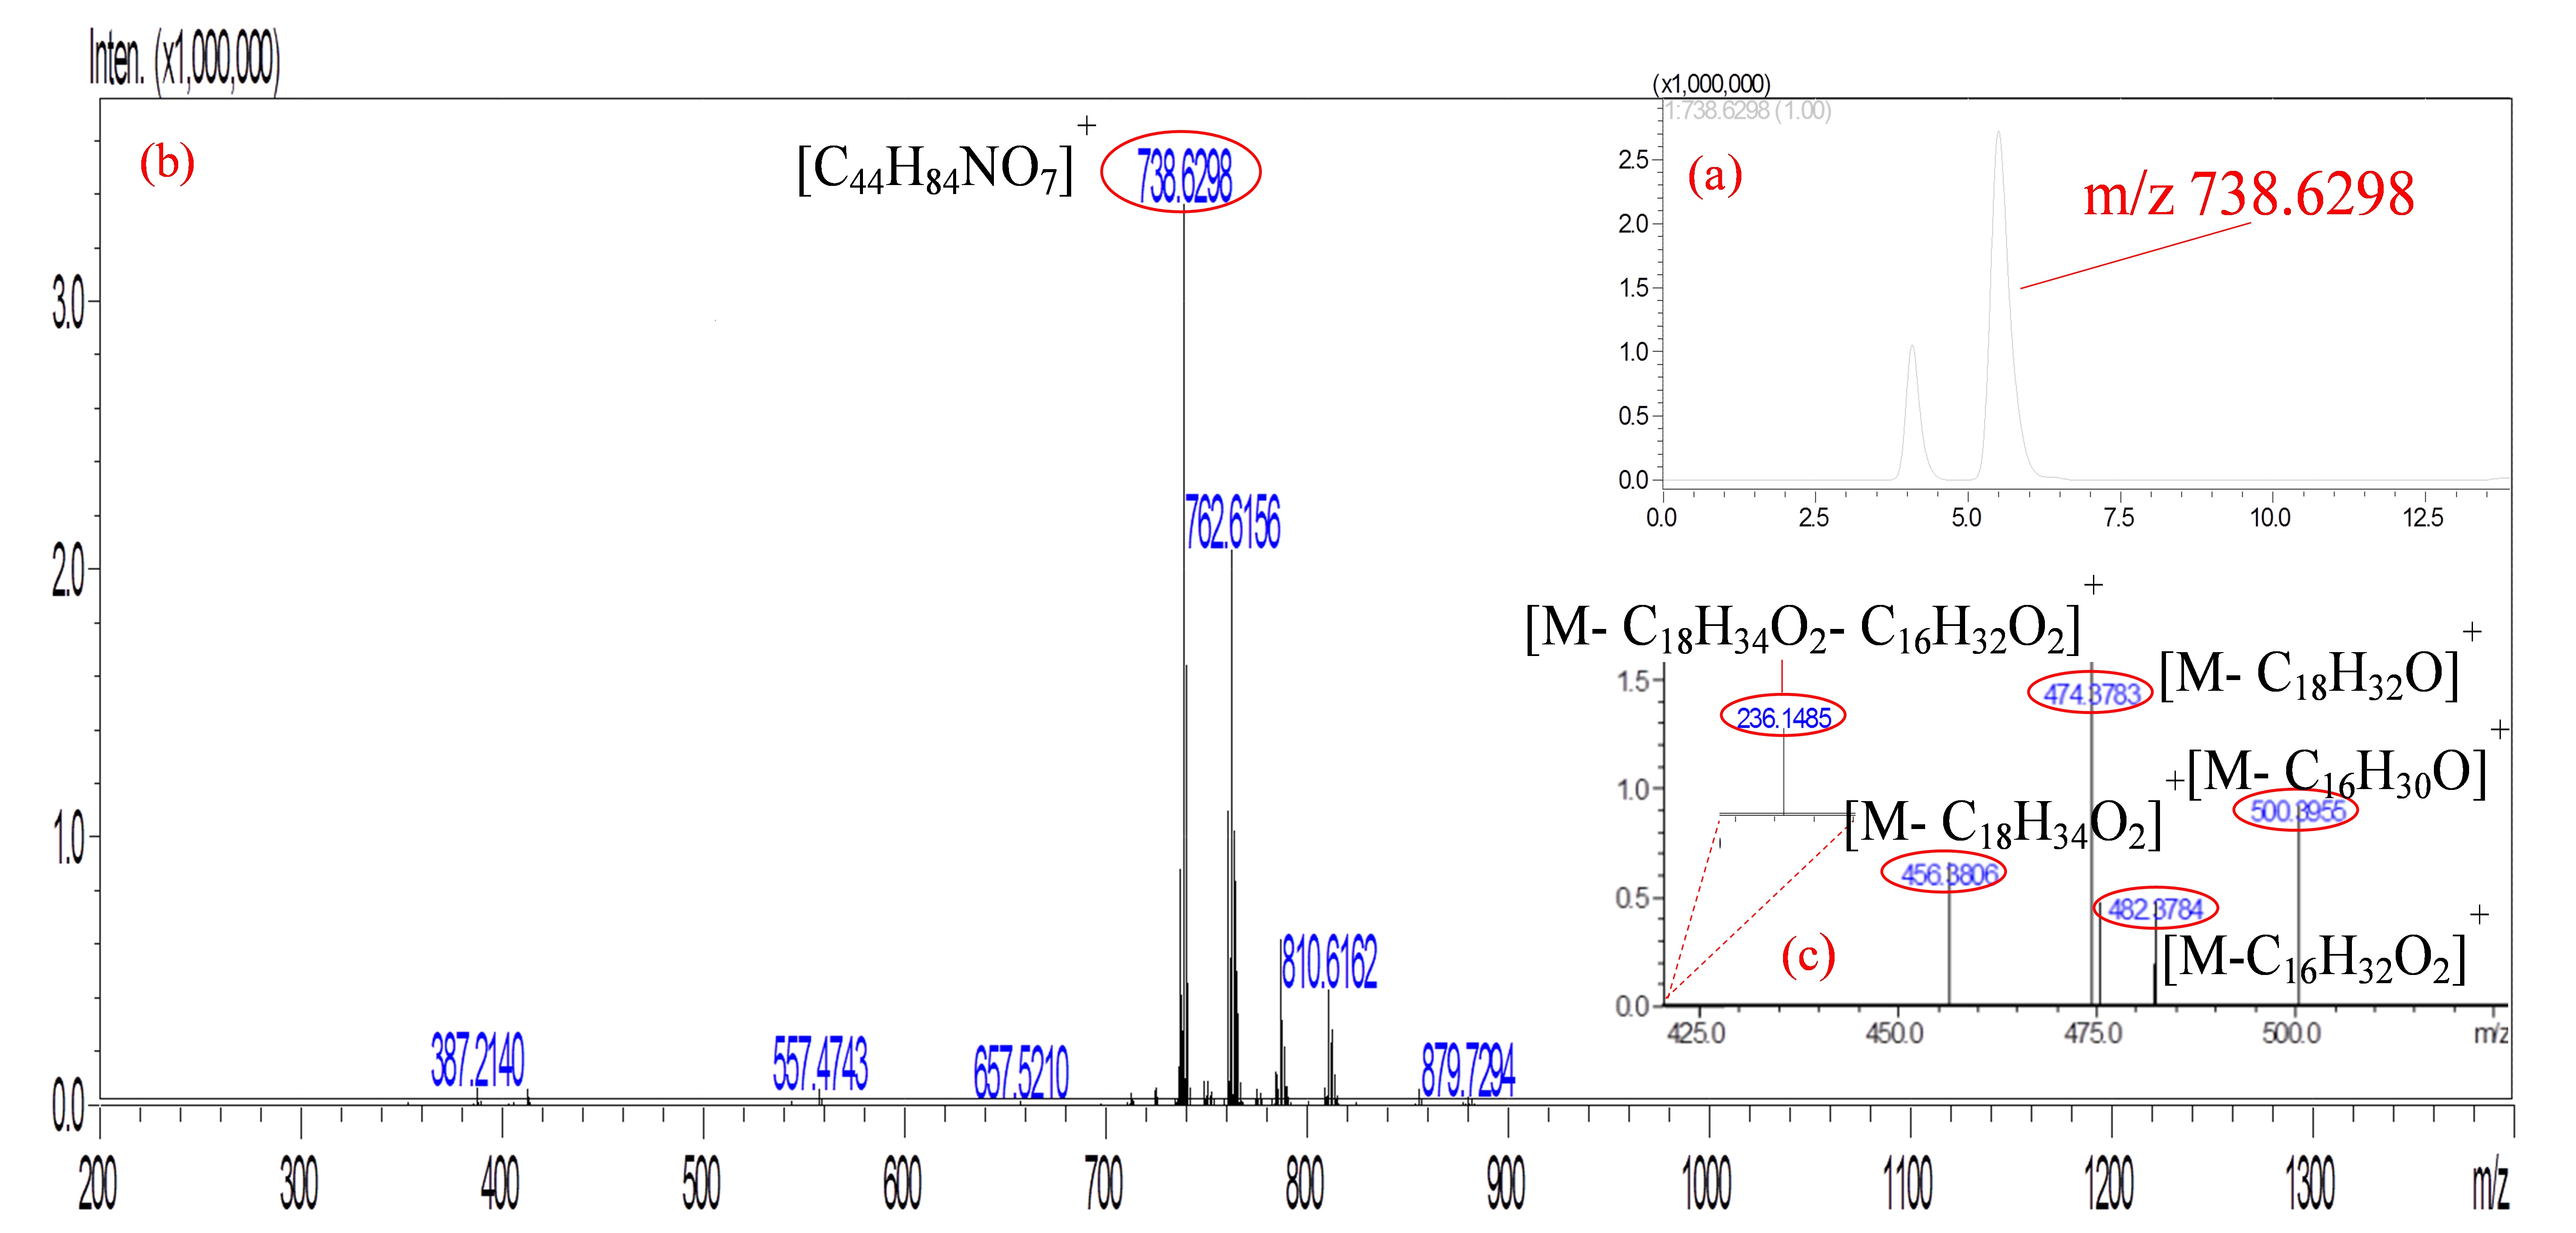

Supplement: f1 [file 8829054.f1.zip › 8829054.f1/Figure 8S.jpg]

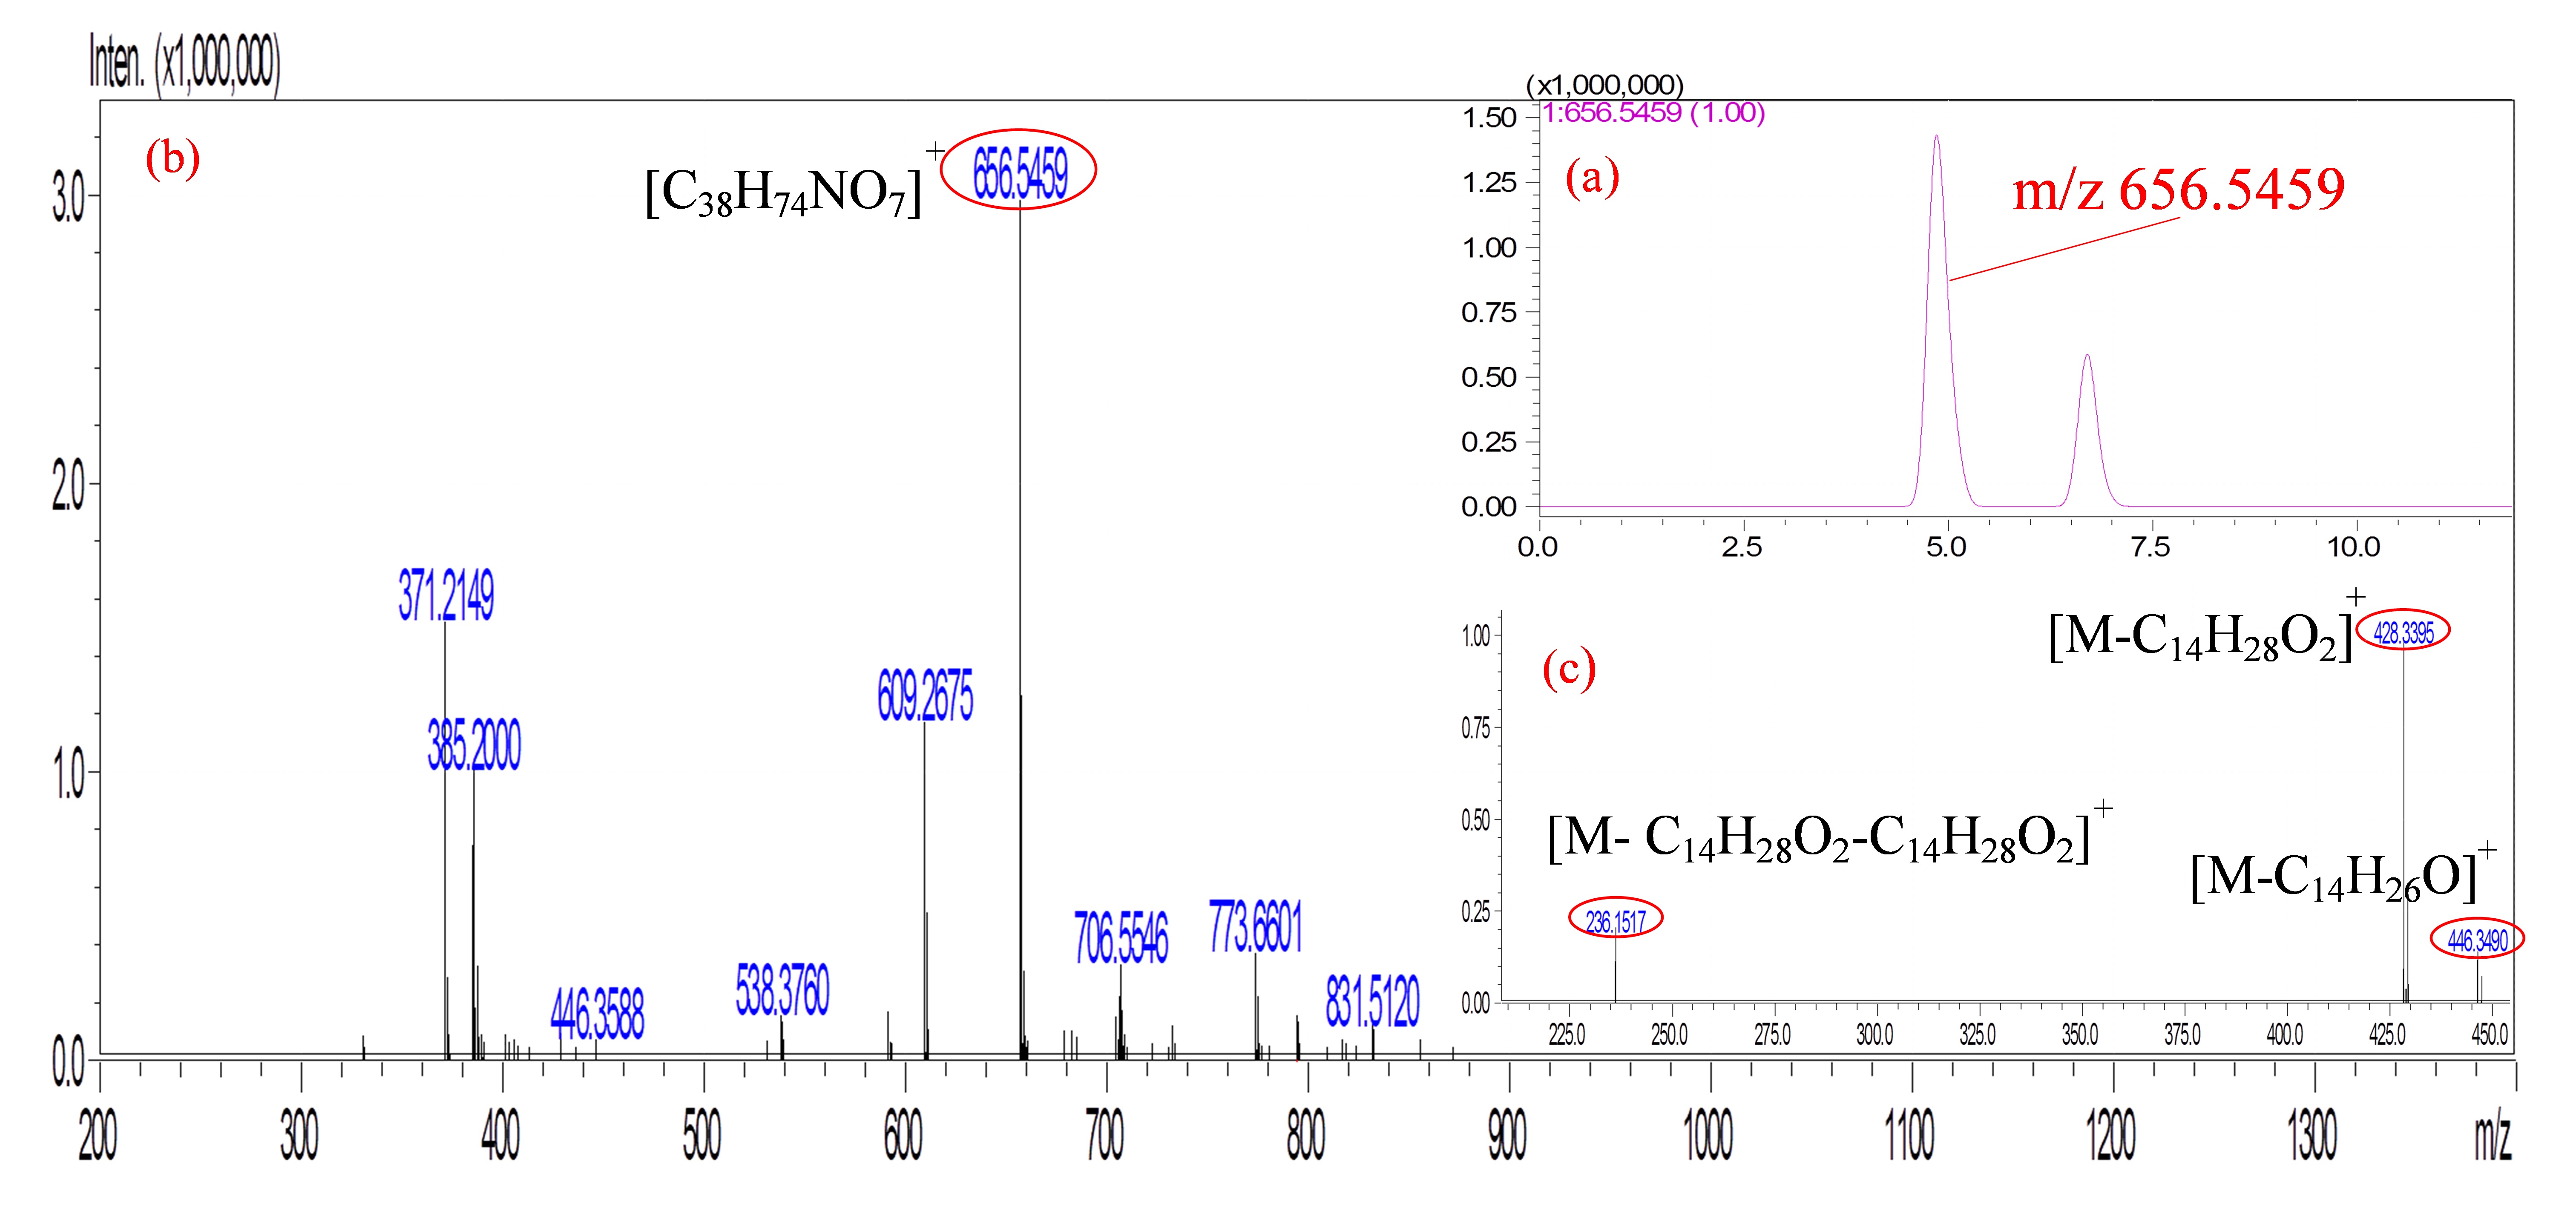

Supplement: f1 [file 8829054.f1.zip › 8829054.f1/Figure 9S.jpg]
